# Supplementary material for: Facile and accelerated production of RuO2 monolayers via a dual-step intercalation process
Source: Royal Society of Chemistry journal article supplement (doi:10.1039/c9qi01678c), 2020-01-01
Supplement: c9qi01678c1.pdf [file c9qi01678c1.pdf]

## [Supporting Information]

### Facile and Accelerated Production of RuO<sub>2</sub> Monolayers via a Dual-Step Intercalation Process

Se Yun Kim,<sup>\*†a</sup> Weon Ho Shin,<sup>†b</sup> Doh Won Jung,<sup>a</sup> Dong-Su Ko,<sup>c</sup> Jong Wook Roh,<sup>d</sup> Sungwoo Hwang,<sup>a</sup> Jongmin Lee,<sup>a</sup> Kimoon Lee,<sup>e</sup> Hee Jung Park,<sup>f</sup> Chan Kwak,<sup>a</sup> Sang-il Kim,<sup>g</sup> Hyung Mo Jeong,<sup>h</sup> Kyu Hyoung Lee,<sup>i</sup> and Hyun Sik Kim<sup>\*j</sup>

a. Inorganic Material Lab, Samsung Advanced Institute of Technology, Suwon, 16678, Republic of Korea. E-mail: seyuni.kim@samsung.com

b. Department of Electronic Materials Engineering, Kwangwoon University, Seoul 01897, Republic of Korea.

c. Autonomous Material Development Lab, Samsung Advanced Institute of Technology, Suwon, 16678, Republic of Korea.

d. School of Nano & Materials Science and Engineering, Kyungpook National University, Sangju, 37224, Republic of Korea.

e. Department of Physics, Kunsan National University, Gunsan, 54150, Republic of Korea.

f. Department of Materials Science and Engineering, Dankook University, Cheonan, 31116, Republic of Korea.

g. Department of Materials Science and Engineering, University of Seoul, Seoul 02504, Republic of Korea.

h. School of Mechanical Engineering, Sungkyunkwan University, Suwon 16419, Republic of Korea.

i. Department of Materials Science and Engineering, Yonsei University, Seoul, 03722, Republic of Korea.

j. Department of Materials Science and Engineering, Hongik University, Seoul 04066, Republic of Korea. E-mail: hyunsik.kim@hongik.ac.kr

† These authors contributed equally to this work.

#### Table of Contents

| Serial Number | Contents                                                                                        | Figure Number | Page Number |
|---------------|-------------------------------------------------------------------------------------------------|---------------|-------------|
| 1             | Thickness of exfoliated RuO <sub>2</sub> monolayer nanosheets                                   | S1            | 2           |
| 2             | Structure information of exfoliated RuO <sub>2</sub> monolayer nanosheets                       | S2            | 3           |
| 3             | The yield and concentration of RuO <sub>2</sub> monolayers derived from the UV-vis spectroscopy | S3            | 4-5         |
| 4             | Atomic structures of DFT (Density Functional Theory) simulation                                 | S4            | 6-7         |

### S1. Thickness of exfoliated RuO<sub>2</sub> monolayer nanosheets

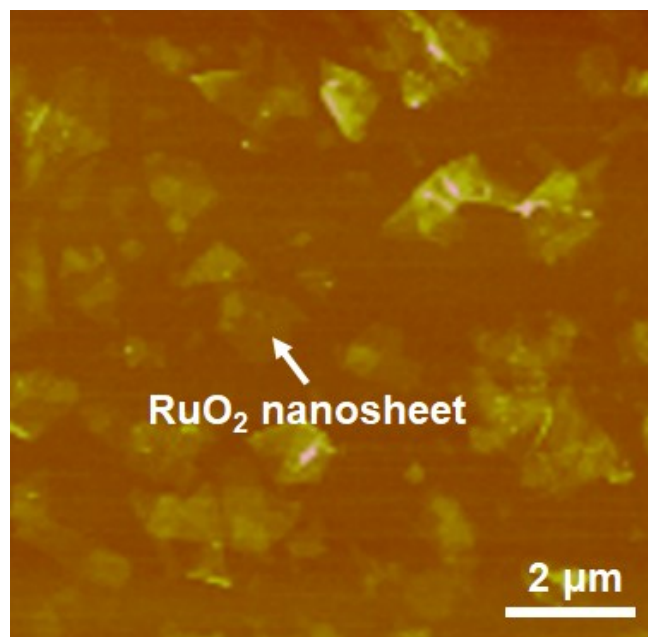

**Figure S1.** Atomic force microscopy (AFM) image of exfoliated RuO<sub>2</sub> monolayer nanosheets.

The average thickness of the RuO<sub>2</sub> monolayer nanosheets is 0.86 nm.



### S3. The yield and concentration of RuO<sub>2</sub> monolayers derived from the UV-vis spectroscopy

The concentration of RuO<sub>2</sub> monolayers was proportional to the absorbance at 360 nm (ref: Journal of Solid State Chemistry 182, 2997 (2009)), and the absorbance was measured by UV-vis spectroscopy. The equation of the RuO<sub>2</sub> concentration is as below.

$$C = \frac{AM_w}{\alpha l} \quad (\text{eq 1})$$

C is concentration of the RuO<sub>2</sub> monolayers, A is absorbance at 360 nm, M<sub>w</sub> is molar weight of RuO<sub>2</sub>, l is the length of cuvette, and  $\alpha$  is the molar extinction coefficient of the dispersed RuO<sub>2</sub> monolayers in aqueous solution, which is  $7.4 \times 10^3 \text{ mol}^{-1}\text{dm}^3\text{cm}^{-1}$  at 360 nm (ref: Journal of Solid State Chemistry 182, 2997 (2009)).

The yield of the RuO<sub>2</sub> monolayers was obtained by dividing the concentration of RuO<sub>2</sub> monolayers to initial RuO<sub>2</sub> concentration. The equation of the yield of the RuO<sub>2</sub> concentration is as below.

$$Y = \frac{AM_w L}{\alpha l m} \quad (\text{eq 1})$$

Y is the yield of the RuO<sub>2</sub> monolayers, L is an initial volume of aqueous solution, and m is an initial weight of H<sub>x</sub>RuO<sub>2</sub> layered materials.

Figure S1a shows UV-vis absorption spectra of the aqueous solution containing RuO<sub>2</sub> monolayers with TBA<sup>+</sup> as an intercalant. Also, Figure S2a shows UV-vis absorption spectra of the RuO<sub>2</sub> monolayer solution using TBA<sup>+</sup> and TMA<sup>+</sup> as intercalants.



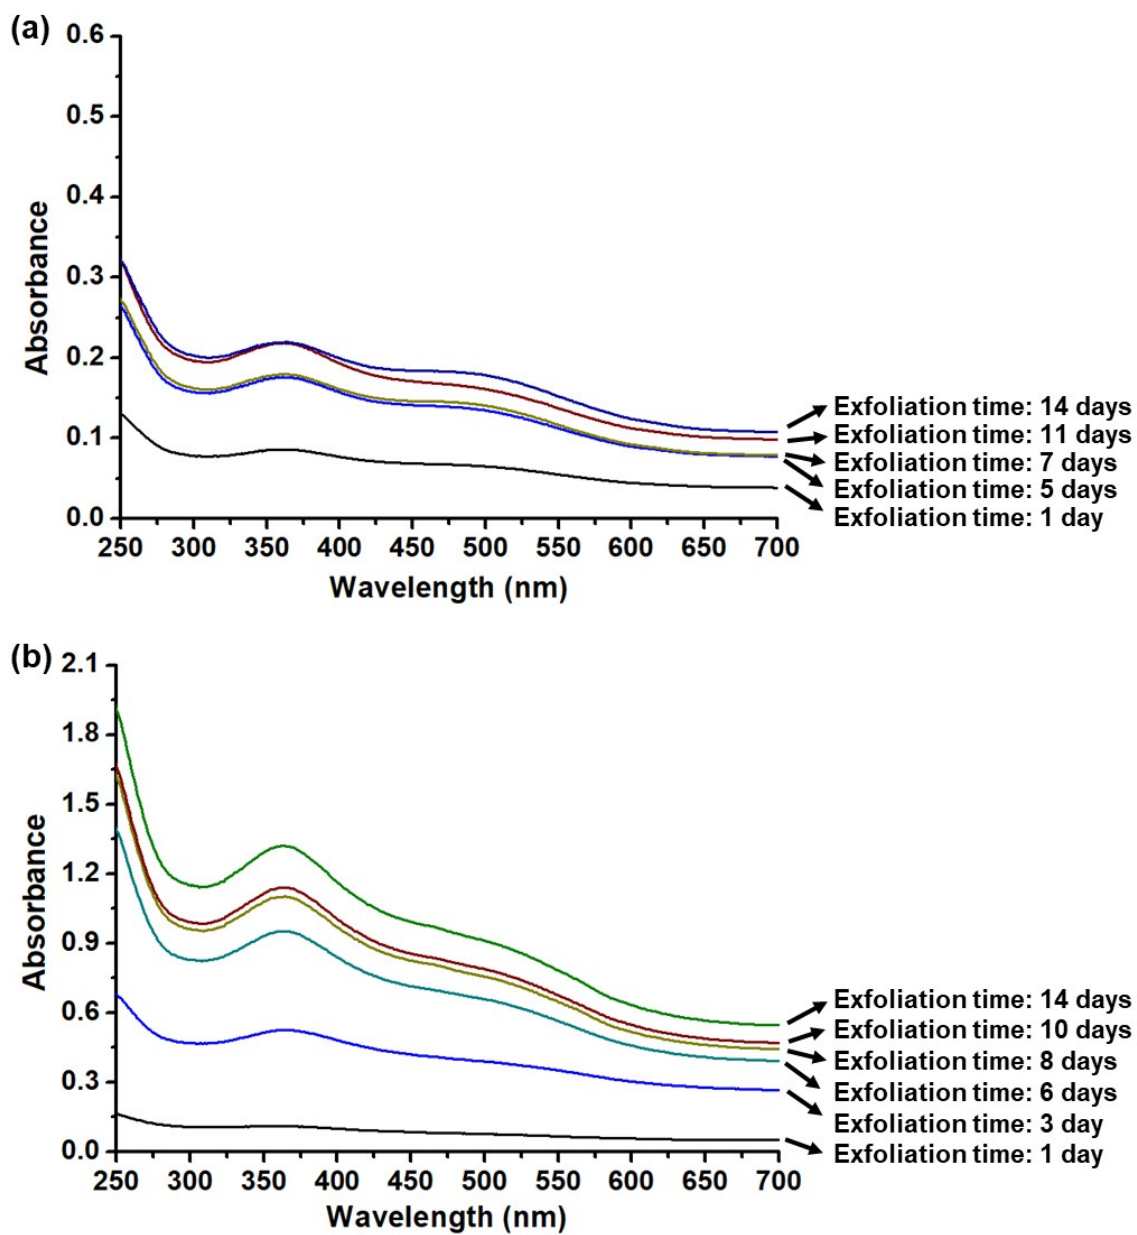

**Figure S3.** UV-vis absorption spectra of the aqueous solution containing RuO<sub>2</sub> monolayers using (a) TBA<sup>+</sup> as an intercalant, and (b) TBA<sup>+</sup> and TMA<sup>+</sup> as intercalants.

## S4. Atomic structures of DFT (Density Functional Theory) simulation

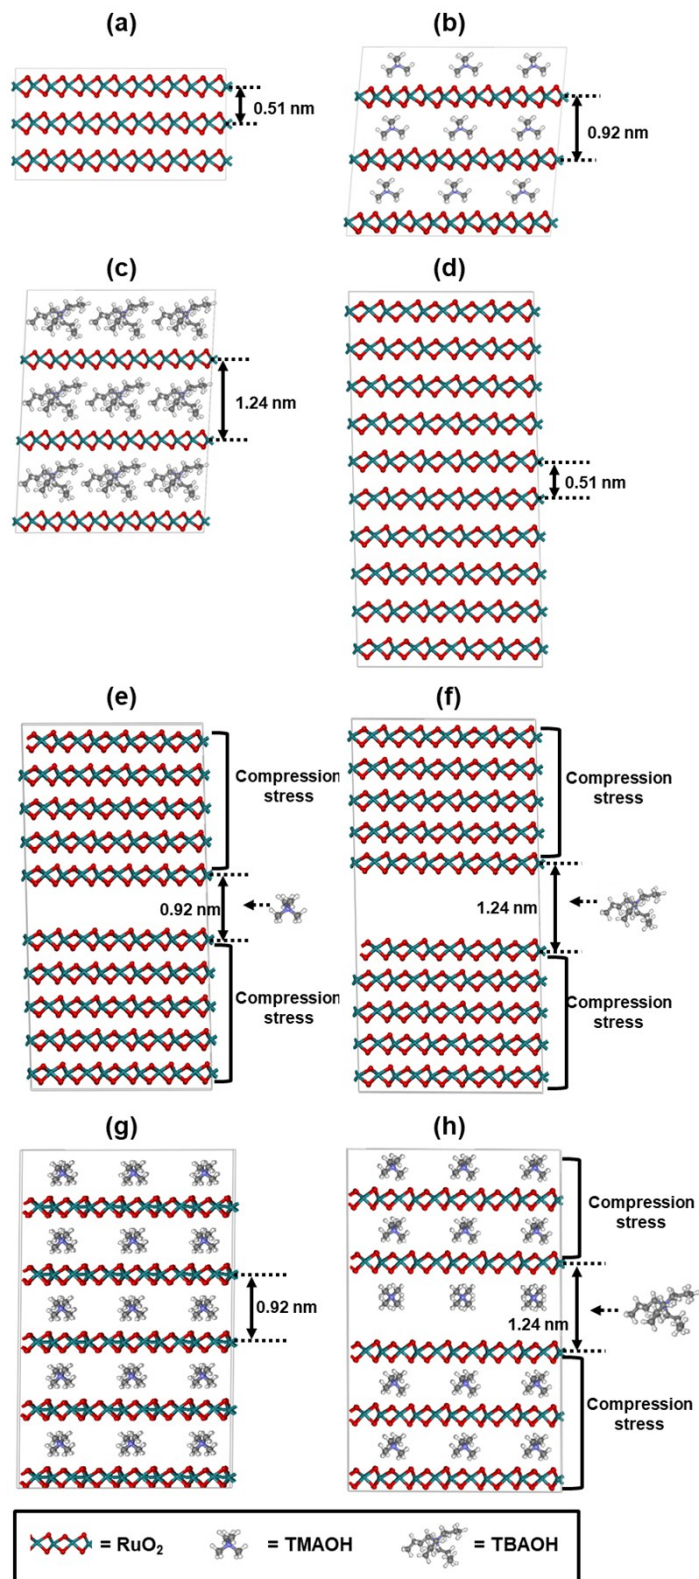

**Figure S4.** Atomic structures of DFT (Density Functional Theory) simulation. (a) RuO<sub>2</sub> layered structure, (b) TMA<sup>+</sup> intercalated, and (c) TBA<sup>+</sup> intercalated RuO<sub>2</sub> layered structures. (d) RuO<sub>2</sub> layered structure without strain. (e) 2 layers in the middle of the RuO<sub>2</sub> layered structure are widened from 0.51 to 0.92 nm for intercalation of TMA<sup>+</sup>. (f) The distance between the RuO<sub>2</sub> layers are pulled apart from 0.51 to 1.24 nm for intercalation of TBA<sup>+</sup>. (g) TMA<sup>+</sup> intercalated RuO<sub>2</sub> layered structure without strain. (h) The RuO<sub>2</sub> layers in the middle of the structure are widened from 0.92 to 1.24 nm for intercalation of TBA<sup>+</sup>. Red, green, grey, blue and white balls represent oxygen, ruthenium, carbon, nitrogen, and hydrogen atoms, respectively.
